# Supplementary material for: Anodic preparation and supercapacitive performance of nano-Co3O4/MnO2composites
Source: Royal Society of Chemistry journal article supplement (doi:10.1039/c4ra13169j), 2014-11-21
Supplement: c4ra13169j1.pdf [file c4ra13169j1.pdf]

# Electronic Supporting Information

## Anodic preparation and supercapacitive performance of nano- $\text{Co}_3\text{O}_4/\text{MnO}_2$ composites

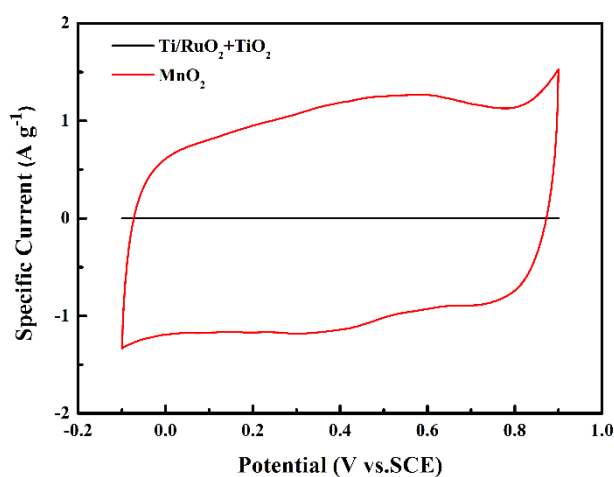

Fig. S1 Cyclic voltammetric curves of  $\text{Ti}/\text{RuO}_2+\text{TiO}_2$  and  $\text{MnO}_2$  at a scan rate of 5  $\text{mV s}^{-1}$ .
